# Supplementary material for: Toxocara canis-induced changes in host intestinal microbial communities
Source: Springer Nature journal article supplement (doi:10.1186/s13071-023-06072-w), 2023-12-19
Supplement: 13071_2023_6072_MOESM1_ESM.pdf [file 13071_2023_6072_MOESM1_ESM.pdf]

# Cladogram

■ CI  
■ II  
■ Tc

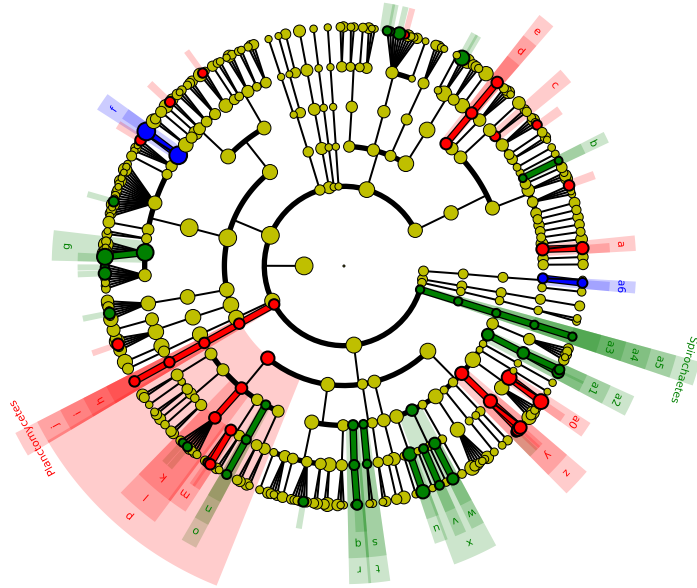

- |                                                               |                                                                |
|---------------------------------------------------------------|----------------------------------------------------------------|
| <span style="color: red;">■</span> a: Corynebacteriaceae      | <span style="color: green;">■</span> r: Rhodocyclales          |
| <span style="color: green;">■</span> b: Mycobacteriaceae      | <span style="color: green;">■</span> s: Bdellovibrionaceae     |
| <span style="color: red;">■</span> c: Pseudonocardiaeae       | <span style="color: green;">■</span> t: Bdellovibrionales      |
| <span style="color: red;">■</span> d: Rubrobacteraceae        | <span style="color: green;">■</span> u: Succinivibrionaceae    |
| <span style="color: red;">■</span> e: Rubrobacterales         | <span style="color: green;">■</span> v: Colwelliaceae          |
| <span style="color: blue;">■</span> f: Clostridiaceae         | <span style="color: green;">■</span> w: Pseudoalteromonadaceae |
| <span style="color: green;">■</span> g: Peptostreptococcaceae | <span style="color: green;">■</span> x: Alteromonadales        |
| <span style="color: red;">■</span> h: Planctomycetaceae       | <span style="color: red;">■</span> y: Pasteurellaceae          |
| <span style="color: red;">■</span> i: Planctomycetales        | <span style="color: red;">■</span> z: Pasteurellales           |
| <span style="color: red;">■</span> j: Planctomycetia          | <span style="color: red;">■</span> a0: Pseudomonadaceae        |
| <span style="color: red;">■</span> k: Rhodobacteraceae        | <span style="color: green;">■</span> a1: Vibrionaceae          |
| <span style="color: red;">■</span> l: Rhodobacterales         | <span style="color: green;">■</span> a2: Vibrionales           |
| <span style="color: red;">■</span> m: Acetobacteraceae        | <span style="color: green;">■</span> a3: Brevinemataceae       |
| <span style="color: green;">■</span> n: Rickettsiaceae        | <span style="color: green;">■</span> a4: Spirochaetales        |
| <span style="color: green;">■</span> o: Rickettsiales         | <span style="color: green;">■</span> a5: Spirochaetia          |
| <span style="color: red;">■</span> p: Alphaproteobacteria     | <span style="color: blue;">■</span> a6: Verrucomicrobiaceae    |
| <span style="color: green;">■</span> q: Rhodocyclaceae        |                                                                |
