# Supplementary material for: Toxocara canis-induced changes in host intestinal microbial communities
Source: Springer Nature journal article supplement (doi:10.1186/s13071-023-06072-w), 2023-12-19

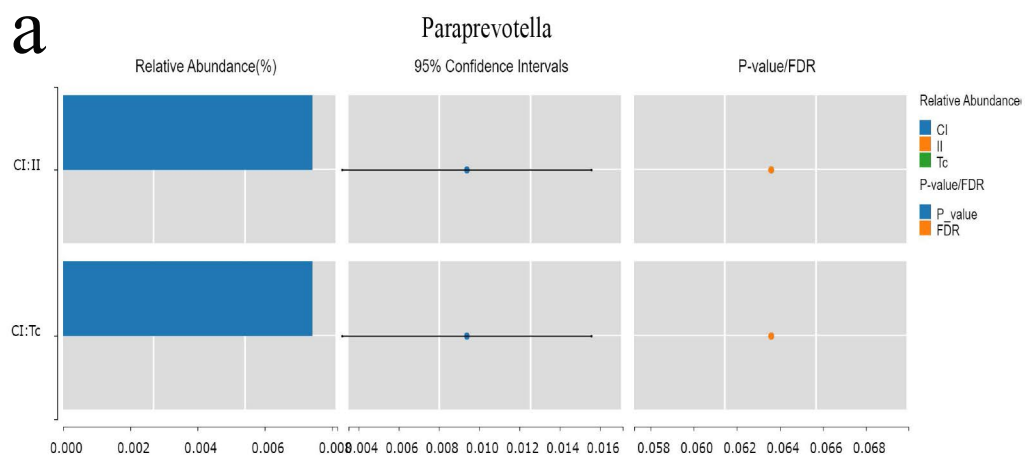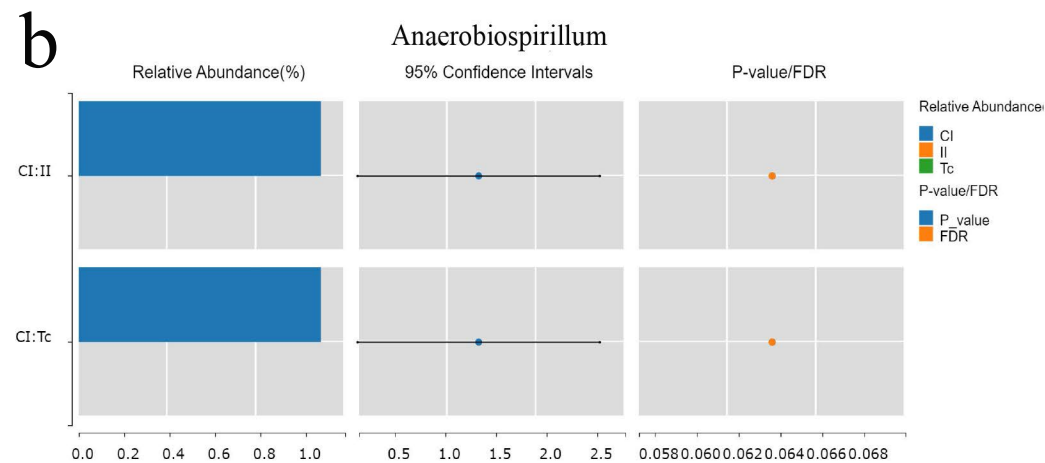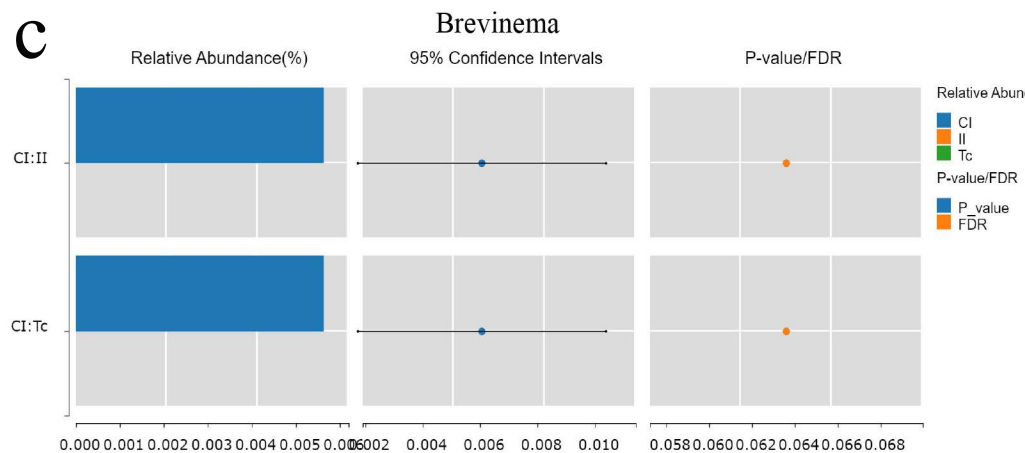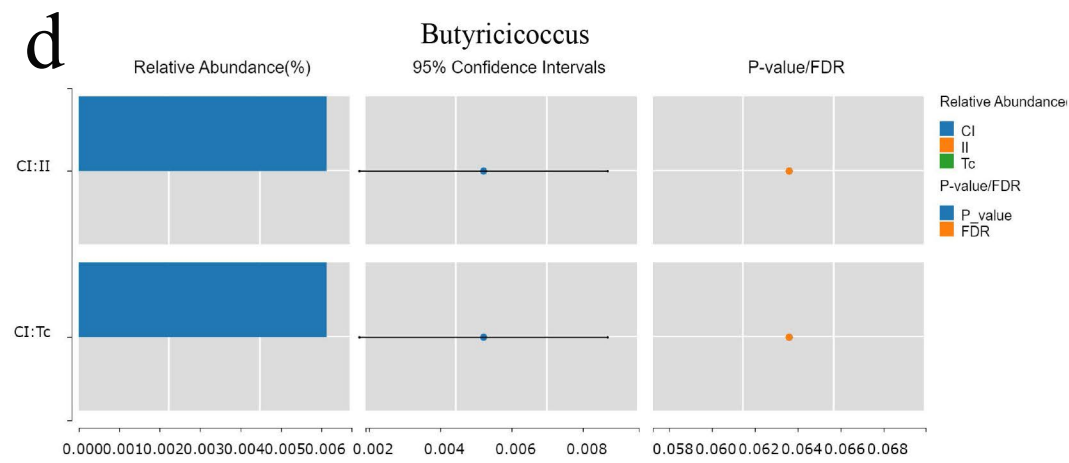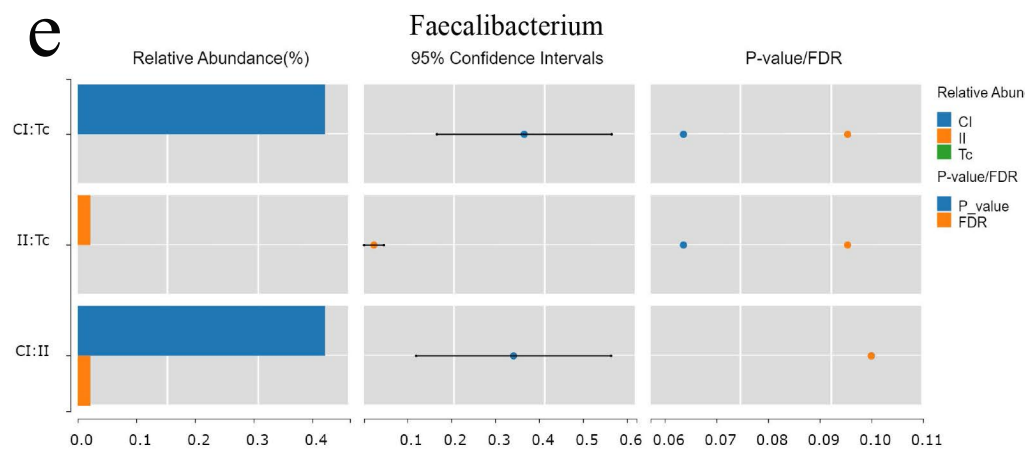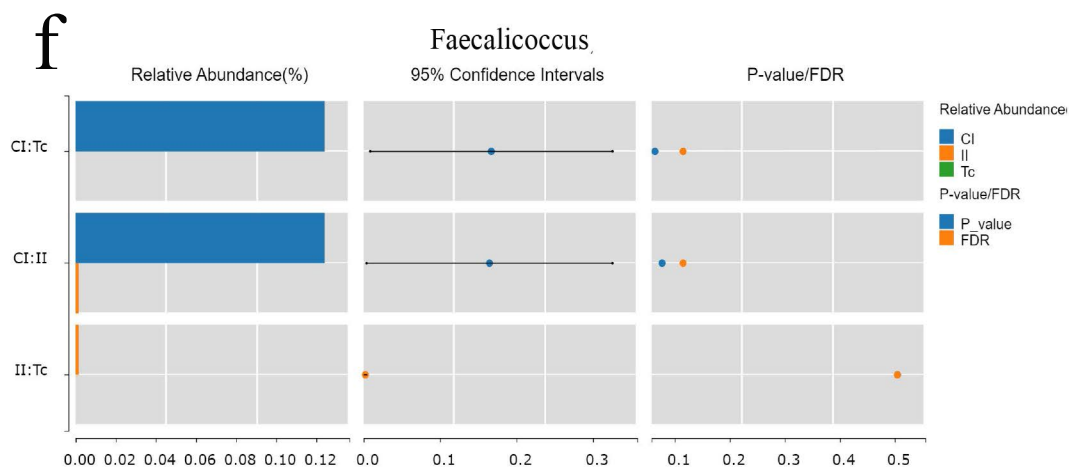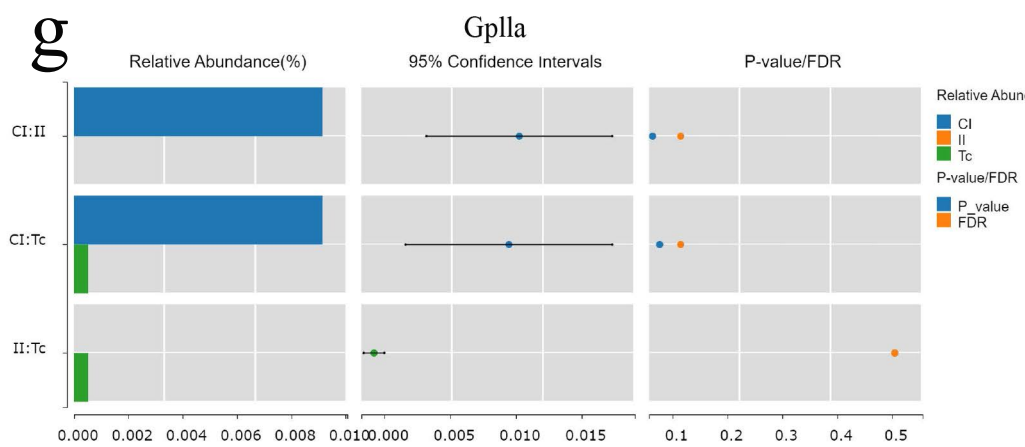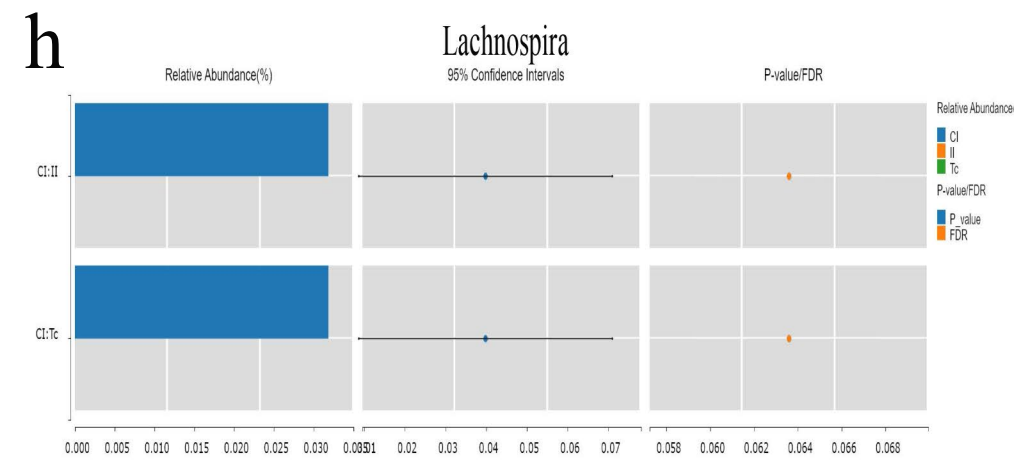

Supplement: 13071_2023_6072_MOESM4_ESM.pdf [file 13071_2023_6072_MOESM4_ESM.pdf]
